# Supplementary material for: A silver-based metal–organic framework material as a ‘reservoir’ of bactericidal metal ions
Source: Royal Society of Chemistry journal article supplement (doi:10.1039/c1nj20202b), 2011-01-01
Supplement: c1nj20202b.pdf [file c1nj20202b.pdf]

## Supporting Information

### A silver-based metal–organic framework material as a ‘reservoir’ of bactericidal metal ions.

M. Berchel,<sup>a</sup> T. Le Gall<sup>b</sup>, C. Denis<sup>a</sup>, S. Le Hir<sup>b</sup>, F. Quentel<sup>a</sup>, C. Elléouet<sup>a</sup>, T. Montier<sup>b</sup>, J.M. Rueff<sup>c</sup>, J.Y. Salaün<sup>a</sup>, J.P. Haelters<sup>a</sup>, G. B. Hix,<sup>d</sup> P. Lehn<sup>b</sup> Paul-Alain Jaffrès<sup>a\*</sup>

<sup>a</sup> Université Européenne de Bretagne, Université de Brest, CNRS UMR 6521, CEMCA, IFR 148 ScInBios, 6 Avenue Le Gorgeu, 29238 Brest - France.

<sup>b</sup> INSERM U613, IFR 148 ScInBioS, Université de Bretagne Occidentale, 46 rue Félix Le Dantec, CS 51819, 29218 Brest Cedex 2, France.

<sup>c</sup> CRISMAT, CNRS UMR 6508, ENSICAEN, 6 Blvd. Maréchal Juin, F-14050 Caen Cedex, France

<sup>d</sup> School of Science and Technology, Nottingham Trent University, Nottingham NG11 8NS, UK.

#### Summary

|                                                                   |   |
|-------------------------------------------------------------------|---|
| SI1- Antibiotic resistance profiles of the bacterial strains..... | 2 |
| SI2- Evaluation of the toxicity.....                              | 3 |
| SI3- LB agar plates: composition and preparation. ....            | 4 |

## SI1- Antibiotic resistance profiles of the bacterial strains.

Table SI1. Antibiotic resistance profile<sup>a</sup> of the bacterial strains herein studied.

| Gram positive strains <sup>b</sup> | Antibiotic <sup>c</sup> |     |      |      |     |     |     |     |     |     |     |     |     |     |     |     |     |     |     |
|------------------------------------|-------------------------|-----|------|------|-----|-----|-----|-----|-----|-----|-----|-----|-----|-----|-----|-----|-----|-----|-----|
|                                    | Oxa                     | Amo | Clav | Gent | Net | Tob | Ami | Kan | Dox | Ery | Lin | Pri | Pef | Cot | Fus | Tei | Van | Lin | Mup |
| SA RN4220                          | S                       | S   | S    | S    | S   | S   | S   | S   | S   | S   | S   | S   | S   | S   | S   | S   | S   | S   | S   |
| SA N315                            | R                       | R   | R    | S    | S   | R   | R   | R   | S   | R   | R   | S   | S   | S   | S   | S   | S   | S   | S   |
| SA Newman                          | S                       | S   | S    | S    | S   | S   | S   | S   | S   | S   | S   | S   | S   | S   | S   | S   | S   | S   | S   |

  

| Gram negative strains <sup>b</sup> | Antibiotic <sup>c</sup> |      |     |     |     |      |      |      |     |     |     |     |     |     |     |     |     |     |     |
|------------------------------------|-------------------------|------|-----|-----|-----|------|------|------|-----|-----|-----|-----|-----|-----|-----|-----|-----|-----|-----|
|                                    | Tic                     | Clav | Pip | Taz | Aza | Ceft | Cefs | Cefo | Imi | Gen | Tob | Net | Ami | Lev | Cif | Fos | Cot | Col | Tem |
| EC MG1655                          | nd                      | nd   | nd  | nd  | nd  | nd   | nd   | nd   | nd  | nd  | nd  | nd  | nd  | nd  | nd  | nd  | nd  | nd  | nd  |
| PA 130709                          | S                       | S    | S   | S   | S   | S    | R    | S    | R   | L   | S   | R   | L   | nd  | S   | R   | R   | R   | R   |
| PA 240709                          | R                       | R    | R   | R   | R   | R    | R    | R    | S   | R   | R   | R   | R   | nd  | S   | R   | R   | S   | nd  |

a. as determined with the antibiogram reference method.

b. SA, *S. aureus*; EC, *E. coli*; PA, *P. aeruginosa*.

c. Abbreviations: Ami, amikacin; Amo, amoxicilline; Aza, aztreonam; Cefo, cefoperazon; Cefs, cefsulodin; Ceft, ceftazidim; Cif, ciprofloxacin; Clav, amoxicilline+clavulinic acid; Col, colistin; Cot, cotrimoxazole; Dox, doxicillin; Ery, erythromycin; Fos, fosfomycin; Fus, fusidic acid; Gent, gentamicin; Imi, imipenem; Kan, kanamycin; Lev, levofloxacin; Lin, lincomycin; Lin, lincomycin; Mup, mupirocin.; Net, netilmicin; Pef, pefloxacin; Pip, piperacillin; Pri, pristinamycin; Taz, piperacillin+tazobactam; Tei, teicoplanine; Tem, temocillin.; Tob, tobramycin; Van, vancomycin; Oxa, oxacilline; Tic, ticarcilline. R, resistant; L, limit; S, sensitive; nd, not determined.

## SI2- Evaluation of the toxicity

**Hemolysis assays.** Human whole blood samples were collected in Heparin/EDTA and chilled at 4°C. These samples were centrifuged at 1000g for 5 min at 4°C and the resulting pellets were washed three times with 1X Phosphate Buffer Saline (PBS). Cells were finally suspended in 1XPBS and chilled at 4°C. Serial dilutions of test compounds were prepared in 1XPBS (50 µL each) and combined with 150 µL of red cells (200 µL final, 3.75% of cells per test). After an incubation of 1 h at 37°C, samples were centrifuged for 10 min at 1000g and 100 µL of each supernatant was transferred in a 96 well plate. Optical densities were evaluated at 540 nm. A volume of 1XPBS was used negative control (0% hemolysis) whereas 1% Triton X-100 was used to calculate the maximal hemolysis value (complete cell lysis).

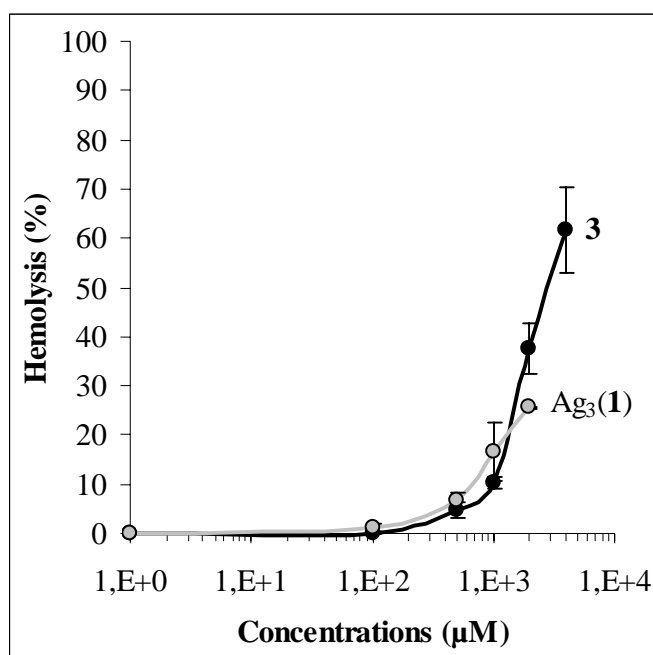

**Figure SI2.** Hemolysis assays for the evaluation of the cytotoxicity of Ag<sub>3</sub>(1). Compound 3 was evaluated in same conditions and used as a reference. (mean +/- SD, with n=3).

### **SI3- LB agar plates: composition and preparation.**

Luria Bertani is a complex nutritive media containing (for a 1 liter solution) 10 g bacto-tryptone, 5 g yeast extract and 10 g NaCl (qsp 1 L dH<sub>2</sub>O). Its pH was adjusted to 7.5 with NaOH. It was supplemented with 15 g agar, melted into solution by warming then sterilized by autoclaving. Distributing in 10 cm petri dishes and cooling allowed obtaining solid nutritive non-selective plates.
